# Supplementary material for: Extracellular Vesicles as Delivery Vehicles for Non-Coding RNAs: Potential Biomarkers for Chronic Liver Diseases
Source: MDPI journal article supplement (doi:10.3390/biom14030277), 2024-02-26
Supplement: s1 [file s1]

**Table S1.** Examples of EV biodistribution time in the liver in mouse models.

| EV source                                                                                                                | EV concentration/ type of imaging                          | EV administration route | Type of Liver disease/cell type uptaking EVs                                                         | Time taken to reach the liver/ Permanence in the liver/ in vivo or ex vivo analysis | References |
|--------------------------------------------------------------------------------------------------------------------------|------------------------------------------------------------|-------------------------|------------------------------------------------------------------------------------------------------|-------------------------------------------------------------------------------------|------------|
| Red blood cell<br>-EVs loaded with miR-negative control (NC)-ASOs or miR-155-ASOs                                        | 100 µg ≈ 2.3 × 10 <sup>10</sup> particles/<br>IVIS imaging | Intravenous             | Acute liver failure/macrophages                                                                      | 12 hours/24 hours (last time point analysed)/ex vivo                                | [166]      |
| MLP29 (murine liver-derived cells)- [124 I] NaI-labelled EVs                                                             | 1.8 ± 0.5 MBq/<br>PET-CT imaging                           | Intravenous             | Healthy/ n.a.                                                                                        | 15 mins/72 hours (last time point analysed)/in vivo                                 | [167]      |
|                                                                                                                          | 0.6 ± 0.2 MBq/<br>automatic gamma counter                  | Into the hock           |                                                                                                      |                                                                                     |            |
| HEK293T-<br>Duramycin labeled EVs                                                                                        | 99mTc-HYNIC-<br>12 ± 3 MBq/<br>SPECT/CT imaging            | Intravenous             | chronic hyperlipidemia/<br>Kupffer cells and liver sinusoidal endothelial cells (from in vitro data) | 60mins/90 mins (last time point analysed)/ in vivo                                  | [70]       |
| Thyroid cancer (CAL-62) and breast cancer (MDA-MB-231) cells<br>-Rluc- labelled CAL-62 EVs or Rluc- labelled MDA-231 EVs | 25 µg of protein/<br>IVIS Lumina II                        | Intravenous             | Naïve nude mice                                                                                      | 10 mins, with a peak at 30 mins /9 days/ in vivo                                    | [168]      |

PET: Positron Emitted Tomography; CT: Computed Tomography, MBq: Megabecquerel; n.a.: not available.
